# Supplementary material for: Solvent-free oxidation of benzyl C–H to ketone with Co–Ni layered double hydroxide as the catalyst and O2 as the sole oxidant
Source: Royal Society of Chemistry journal article supplement (doi:10.1039/d3dt00851g), 2023-01-01
Supplement: d3dt00851g1.pdf [file d3dt00851g1.pdf]

## Supporting Information

### Solvent-free Oxidation of Benzyl C-H to Ketone with Co-Ni Layered Double Hydroxide as Catalyst using O<sub>2</sub> as Sole Oxidant

Jiali Ren,<sup>a†</sup> Yan Zhou,<sup>b†</sup> Hui Miao,<sup>\*a</sup> Chaoqun Wang,<sup>a</sup> Shanshan Lv,<sup>b</sup> Manman Song,<sup>b</sup> Feng Li,<sup>b</sup> Mengmeng Feng,<sup>b</sup> Zheng Chen<sup>\*b</sup>

**Table S1.** ICP-OES results of CoNi-LDH with different feed ratio of Co/Ni.

| Sample                 | Co (wt.%) | Ni (wt.%) | Co:Ni  |
|------------------------|-----------|-----------|--------|
| Co <sub>4</sub> Ni-LDH | 29.8      | 18.0      | 1.7:1  |
| Co <sub>2</sub> Ni-LDH | 27.3      | 29.0      | 0.94:1 |
| CoNi-LDH               | 22.3      | 26.0      | 0.85:1 |
| CoNi <sub>2</sub> -LDH | 18.0      | 36.8      | 0.5:1  |
| CoNi <sub>4</sub> -LDH | 12.2      | 42.5      | 0.3:1  |

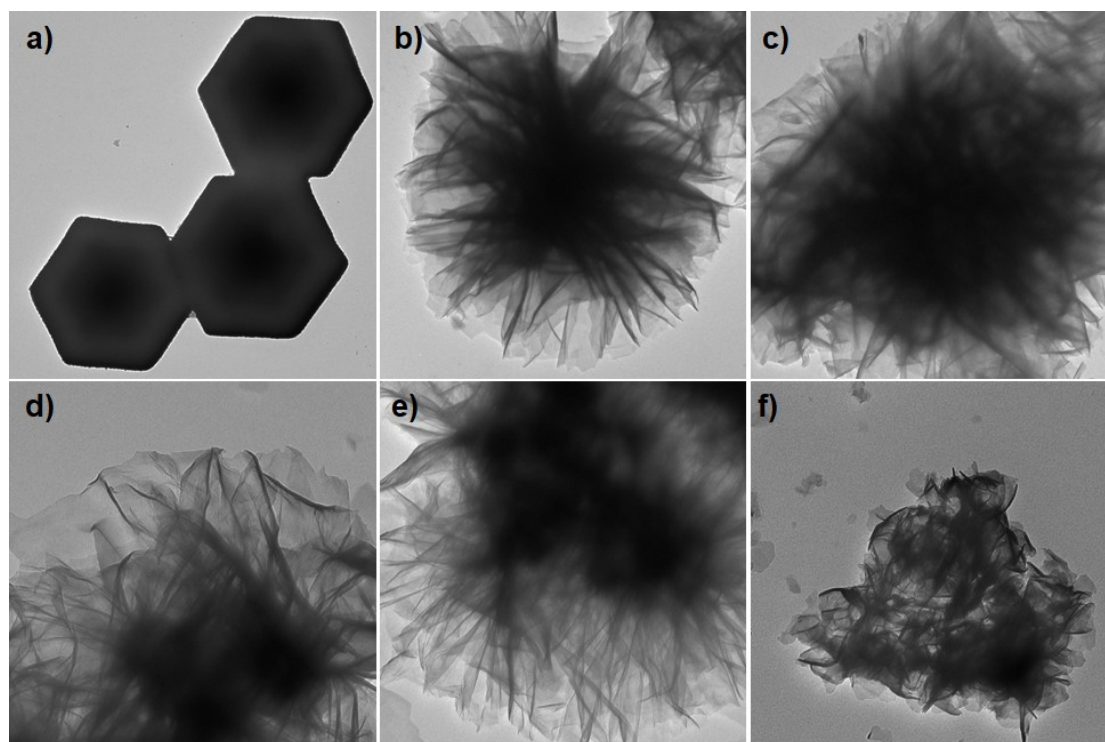

**Fig. S1** The representative TEM images of a) ZIF-67; b) Co<sub>4</sub>Ni-LDH; c) CoNi-LDH; d) CoNi<sub>2</sub>-LDH; e) CoNi<sub>4</sub>-LDH; f)  $\alpha$ -Ni(OH)<sub>2</sub>.

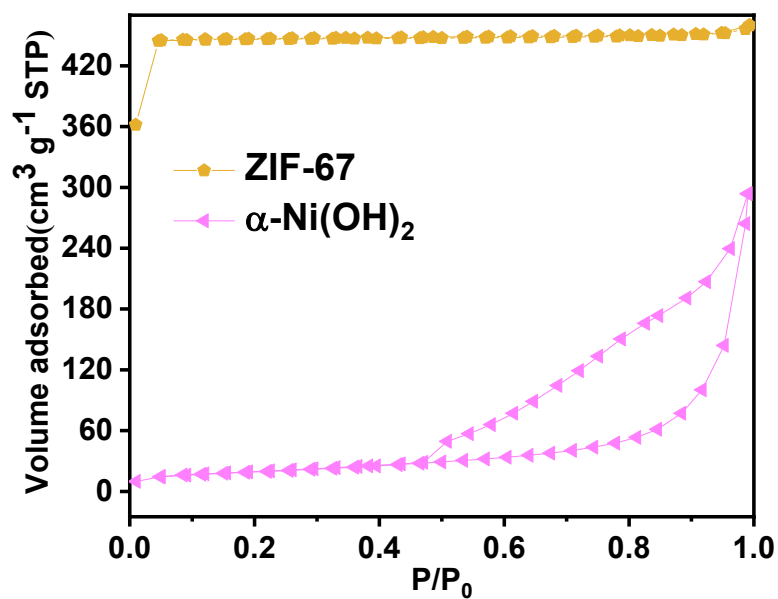

Fig. S2 The N<sub>2</sub> adsorption-desorption isotherm curve of ZIF-67 and  $\alpha$ -Ni(OH)<sub>2</sub>.

Table S2. The specific surface area and pore volume of different samples

| Sample                        | S <sub>BET</sub><br>(m <sup>2</sup> /g) | Pore<br>Volume (cm <sup>3</sup> /g) |
|-------------------------------|-----------------------------------------|-------------------------------------|
| ZIF-67                        | 1933                                    | 0.699                               |
| Co <sub>4</sub> Ni-LDH        | 189                                     | 0.104                               |
| Co <sub>2</sub> Ni-LDH        | 22.7                                    | 0.035                               |
| CoNi-LDH                      | 22.3                                    | 0.036                               |
| CoNi <sub>2</sub> -LDH        | 44                                      | 0.080                               |
| CoNi <sub>4</sub> -LDH        | 80.6                                    | 0.153                               |
| $\alpha$ -Ni(OH) <sub>2</sub> | 68                                      | 0.217                               |

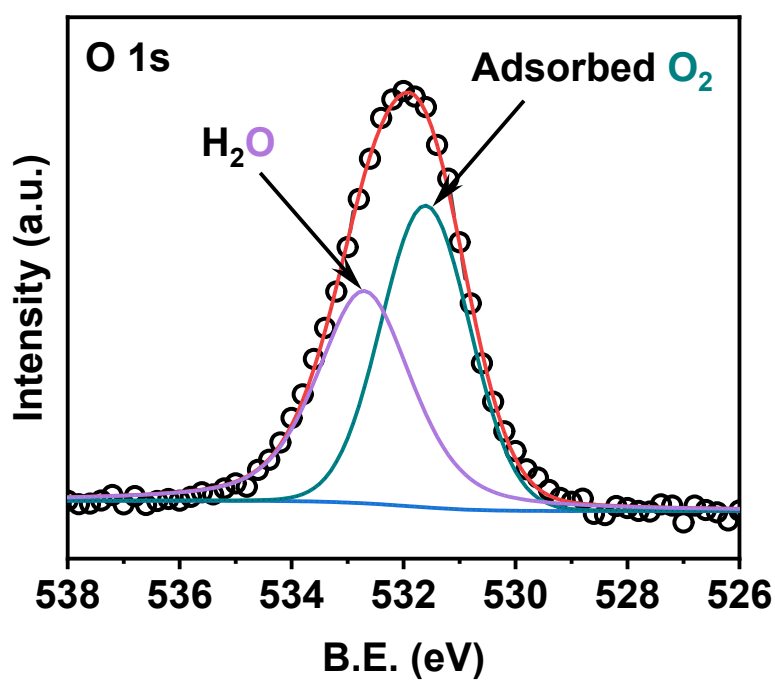

Fig. S3 High-resolution O 1s spectra of ZIF-67.

Table S3. The ratio of O species in different samples determined by XPS.

| Sample                 | M-O      | M-OH     | H <sub>2</sub> O | M-O ratio |
|------------------------|----------|----------|------------------|-----------|
| ZIF-67                 | 611      | 30682.51 | 28054.74         | 0.01      |
| Co <sub>4</sub> Ni-LDH | 8000     | 283045.1 | 24796.98         | 0.03      |
| Co <sub>2</sub> Ni-LDH | 25000    | 177129.7 | 30544.36         | 0.11      |
| CoNi-LDH               | 36730.16 | 235192.6 | 57813.89         | 0.11      |
| CoNi <sub>2</sub> -LDH | 20466.96 | 173238.5 | 118690.8         | 0.07      |
| CoNi <sub>4</sub> -LDH | 39934.72 | 247491.2 | 205154.3         | 0.08      |
| a-Ni(OH) <sub>2</sub>  | 7855.96  | 268250.4 | 52122.25         | 0.02      |

**Table S4.** The ratio of Co<sup>2+</sup> and Co<sup>3+</sup> in different samples determined by XPS.

| Sample                 | Co <sup>2+</sup> area | Co <sup>3+</sup> area | Co <sup>2+</sup> ratio | Co <sup>3+</sup> ratio |
|------------------------|-----------------------|-----------------------|------------------------|------------------------|
| ZIF-67                 | 51828.07              | 6299.97               | 0.89                   | 0.11                   |
| Co <sub>4</sub> Ni-LDH | 61194.77              | 99003.99              | 0.38                   | 0.62                   |
| Co <sub>2</sub> Ni-LDH | 25177.73              | 48177.09              | 0.34                   | 0.66                   |
| CoNi-LDH               | 33271.16              | 49438.25              | 0.40                   | 0.60                   |
| CoNi <sub>2</sub> -LDH | 30696.55              | 28898.63              | 0.52                   | 0.49                   |
| CoNi <sub>4</sub> -LDH | 38750.41              | 33050.51              | 0.54                   | 0.46                   |

**Table S5.** The ratio of Ni<sup>2+</sup> and Ni<sup>3+</sup> in different samples determined by XPS.

| Sample                 | Ni <sup>2+</sup> area | Ni <sup>3+</sup> area | Ni <sup>2+</sup> ratio | Ni <sup>3+</sup> ratio |
|------------------------|-----------------------|-----------------------|------------------------|------------------------|
| Co <sub>4</sub> Ni-LDH | 67236.94              | 64170.61              | 0.51                   | 0.49                   |
| Co <sub>2</sub> Ni-LDH | 79638.68              | 65178.18              | 0.55                   | 0.45                   |
| CoNi-LDH               | 119331.4              | 95601.33              | 0.56                   | 0.44                   |
| CoNi <sub>2</sub> -LDH | 114760.4              | 90981.32              | 0.56                   | 0.44                   |
| CoNi <sub>4</sub> -LDH | 175322.60             | 162121.60             | 0.61                   | 0.39                   |
| α-Ni(OH) <sub>2</sub>  | 168016.3              | 105427.6              | 0.52                   | 0.48                   |

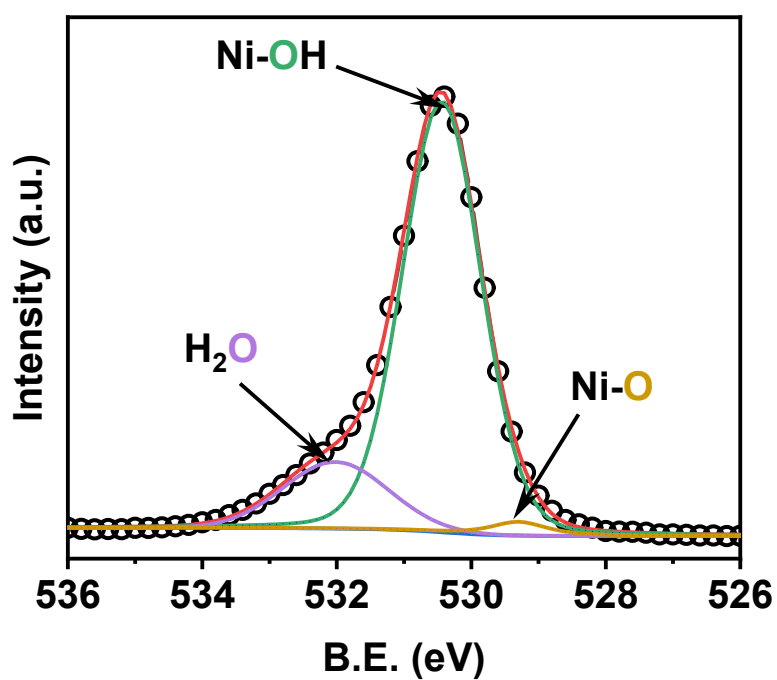

Fig. S4 High-resolution O 1s spectra of  $\alpha$ -Ni(OH)<sub>2</sub>.

Table S6. The effect of the amount of Co<sub>2</sub>Ni-LDH as catalyst on the selective oxidation of ethylbenzene.

| Entry <sup>[a]</sup> | Cat. <sup>[b]</sup> | Con.(%) <sup>[c]</sup> | Sel.(%) <sup>[c]</sup> |
|----------------------|---------------------|------------------------|------------------------|
| 1                    | 0                   | 2.3                    | 3.4                    |
| 2                    | 20 mg               | 49.3                   | 74.6                   |
| 3                    | 30 mg               | 69.1                   | 96.8                   |
| 4                    | 50 mg               | 63.2                   | 79.2                   |
| 5                    | 80 mg               | 11.0                   | 71.2                   |

[a] reaction parameter: 2 mL ethylbenzene, O<sub>2</sub> balloon, 110 °C and 12 h; [b] the catalyst is Co<sub>2</sub>Ni-LDH; [c] conversion and selectivity are determined by GC and GC-MS.

**Table S7.** The catalytic oxidation of ethylbenzene using Co<sub>2</sub>Ni-LDH at 36 h and 48 h.

| Entry | Time (h) | Product      | Conversion/ Selectivity |
|-------|----------|--------------|-------------------------|
| 1     | 36       | Acetophenone | >99.9%/>99.9%           |
| 2     | 48       | Acetophenone | >99.9%/>99.9%           |

**Table S8.** Comparison of Co<sub>2</sub>Ni-LDH with other reported catalysts in solvent-free oxidation of ethylbenzene with O<sub>2</sub> as sole oxidant.

| Catalyst                                | Condition                       | Solvent | Product      | Conversion / Selectivity | References |
|-----------------------------------------|---------------------------------|---------|--------------|--------------------------|------------|
| Co-SiO <sub>2</sub>                     | 120 °C, 1 MPa, O <sub>2</sub>   | free    | Acetophenone | 8.3%/ 20.1%              | 1          |
| Ni-MOF-5                                | 150 °C, 1 atm, O <sub>2</sub>   | free    | Acetophenone | 55.3%/ 90.2%             | 2          |
| Co-N-C                                  | 120 °C, 0.8 MPa, O <sub>2</sub> | free    | Acetophenone | 14.1%/ 73.2%             | 3          |
| Mn-MOF-74                               | 135 °C, 1 atm, O <sub>2</sub>   | free    | Acetophenone | 66%/ 89%                 | 4          |
| Ce-BTC                                  | 160 °C, 1 atm, O <sub>2</sub>   | free    | Acetophenone | 84.99%/ 95.63%           | 5          |
| mCeO <sub>2</sub> :0.05Ni               | 120 °C, 10 bar, O <sub>2</sub>  | free    | Acetophenone | 29%/ 83%                 | 6          |
| mCo <sub>3</sub> O <sub>4</sub> -0.1NiO | 120 °C, 0.6 MPa, O <sub>2</sub> | free    | Acetophenone | 68.0%/ 95.4%             | 7          |
| Co <sub>2</sub> Ni-LDH                  | 120 °C, 1 atm, O <sub>2</sub>   | free    | Acetophenone | 97.8%/ 98.8%             | This work  |
| Co <sub>2</sub> Ni-LDH                  | 130 °C, 1 atm, O <sub>2</sub>   | free    | Acetophenone | >99.9%/ >99.9%           | This work  |

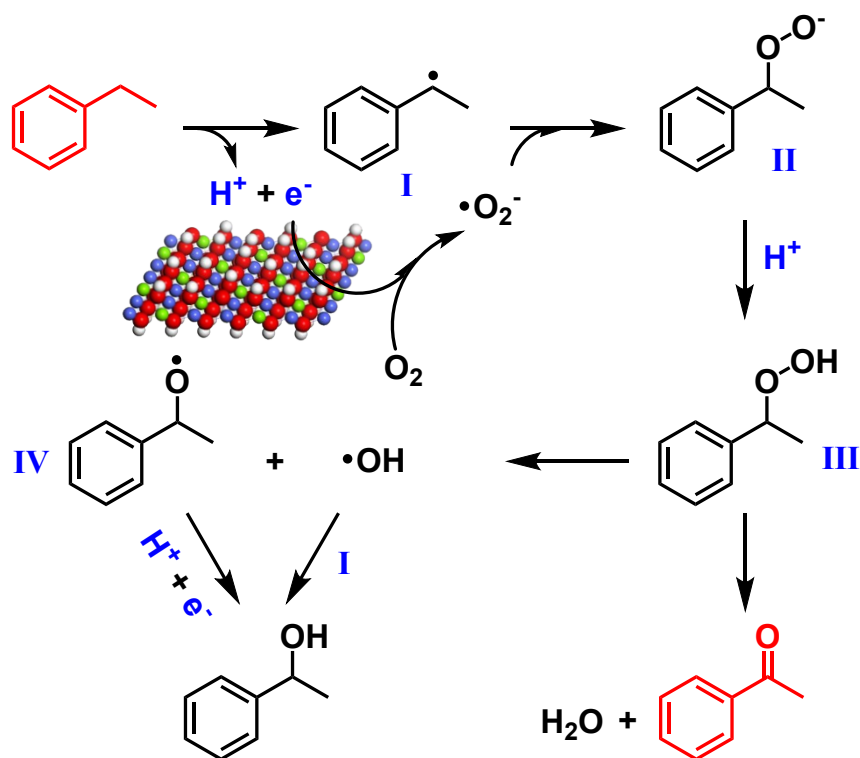

Fig. S5 The proposed mechanism of CoNi-LDH catalysed oxidation of ethylbenzene.

Table S9. The quenching experiment of free radical using scavenger.

| Entry <sup>[a]</sup> | Radical scavenger <sup>[b]</sup> | Cov.(%) <sup>[c]</sup> | Sel(%) <sup>[c]</sup> |
|----------------------|----------------------------------|------------------------|-----------------------|
| 1                    | -                                | 5.7                    | 77.4                  |
| 2                    | p-benzoquinone                   | 0                      | 0                     |
| 3                    | 4-chloro-2-nitrophenol           | 4.7                    | 60.7                  |
| 4                    | tert-butanol                     | 2.6                    | 89.1                  |

[a] reaction parameter: 2 mL ethylbenzene, 30 mg Co<sub>2</sub>Ni-LDH, O<sub>2</sub> balloon for 5 minutes, 120 °C and 24 hours; [b] 2 mmol of radical scavenger; [c] conversion and selectivity are determined by GC and GC-MS.

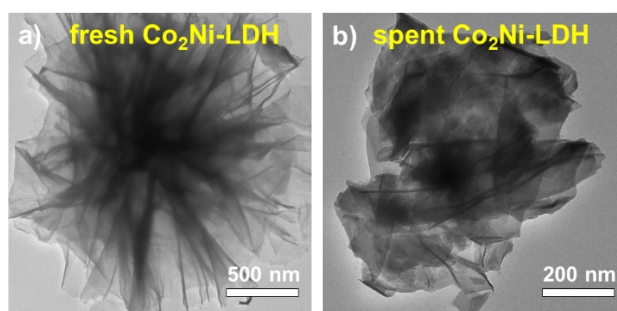

**Fig. S6** TEM comparison of a) fresh and b) spent  $\text{Co}_2\text{Ni-LDH}$  catalyst.

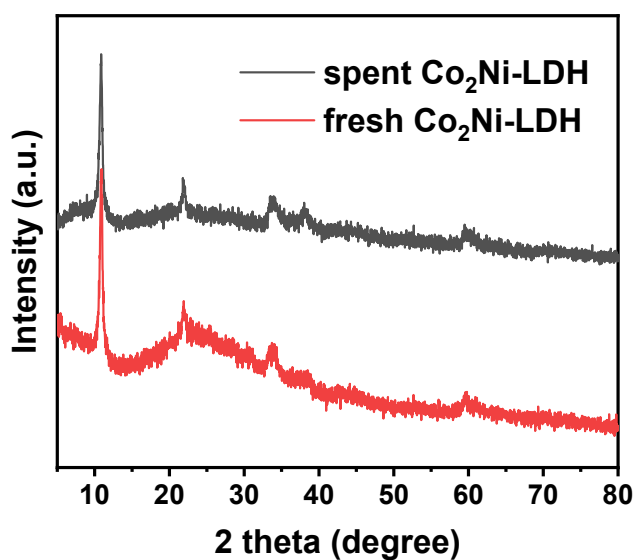

**Fig. S7** XRD comparison of fresh and spent  $\text{Co}_2\text{Ni-LDH}$  catalyst.

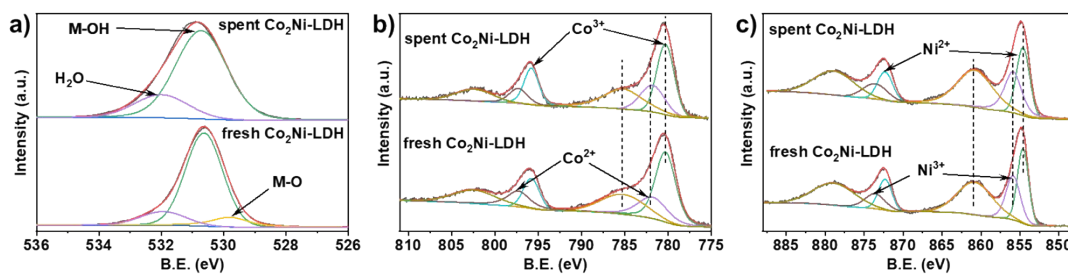

**Fig. S8** The XPS comparison of fresh and spent  $\text{Co}_2\text{Ni-LDH}$ : High-resolution a)  $\text{O}1s$  spectra; b)  $\text{Co}2p$  spectra and c)  $\text{Ni}2p$  spectra.



1. C. Chen, J. Xu, Q. Zhang, Y. Ma, L. Zhou and M. Wang, *Chem Commun (Camb)*, 2011, **47**, 1336-1338.
2. M. M. Peng, U. J. Jeon, M. Ganesh, A. Aziz, R. Vinodh, M. Palanichamy and H. T. Jang, *Bulletin of the Korean Chemical Society*, 2014, **35**, 3213-3218.
3. L. Fu, Y. Lu, Z. Liu and R. Zhu, *Chinese Journal of Catalysis*, 2016, **37**, 398-404.
4. Y. Kuwahara, Y. Yoshimura and H. Yamashita, *Dalton Trans*, 2017, **46**, 8415-8421.
5. M. M. Peng, M. Ganesh, R. Vinodh, M. Palanichamy and H. T. Jang, *Arabian Journal of Chemistry*, 2019, **12**, 1358-1364.
6. Y. Liu and R. Zhang, *Colloids and Surfaces A: Physicochemical and Engineering Aspects*, 2020, **603**.
7. Y. Liu, B. Lu, H. Ning, L. Zhang, Q. Luo, H. Ban and S. Mao, *Inorg Chem*, 2023, **62**, 3195-3201.
